# Supplementary material for: Activating MoS2 basal planes for hydrogen evolution through direct CVD morphology control
Source: Royal Society of Chemistry journal article supplement (doi:10.1039/c9ta08738a), 2019-01-01
Supplement: c9ta08738a1.pdf [file c9ta08738a1.pdf]

# Supporting Information for Activating MoS<sub>2</sub> basal planes for hydrogen evolution through direct CVD morphology controlling

Lianqing Dong <sup>†</sup>, Shaoqiang Guo <sup>†</sup>, Yuyan Wang <sup>†</sup>, Qinghua Zhang <sup>‡</sup>, Lin Gu <sup>‡</sup>,  
Caofeng Pan <sup>§</sup>, Junying Zhang <sup>†\*</sup>

<sup>†</sup> Key laboratory of Micro-nano Measurement, Manipulation and Physics (Ministry of Education), Department of Physics, Beihang University, Beijing 100191, China

<sup>‡</sup> Beijing National Laboratory for Condensed Matter Physics Institute of Physics, Chinese Academy of Sciences, Beijing 100190, China

<sup>§</sup> Beijing Institute of Nanoenergy and Nanosystems, Chinese Academy of Sciences, Beijing 100083, China

\*Corresponding Author: zjy@buaa.edu.cn (J. Y. Zhang)

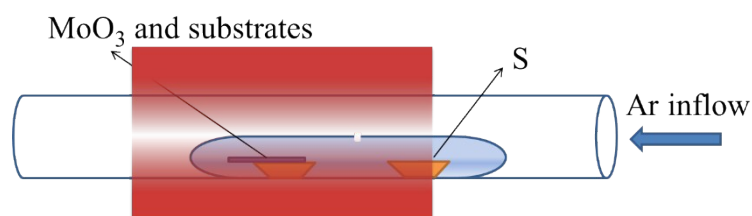

**Fig. S1** Schematic illustration of the CVD system.

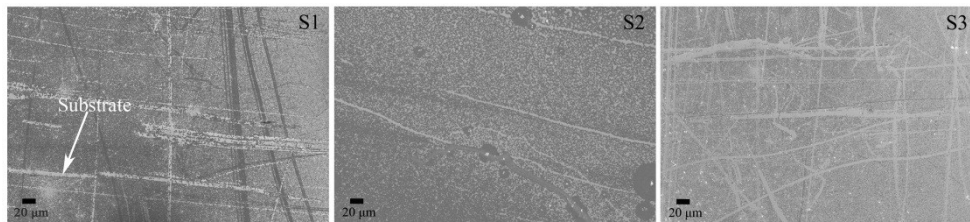

**Fig. S2** The same coverage of different samples with hexagonal monolayer MoS<sub>2</sub> flakes.

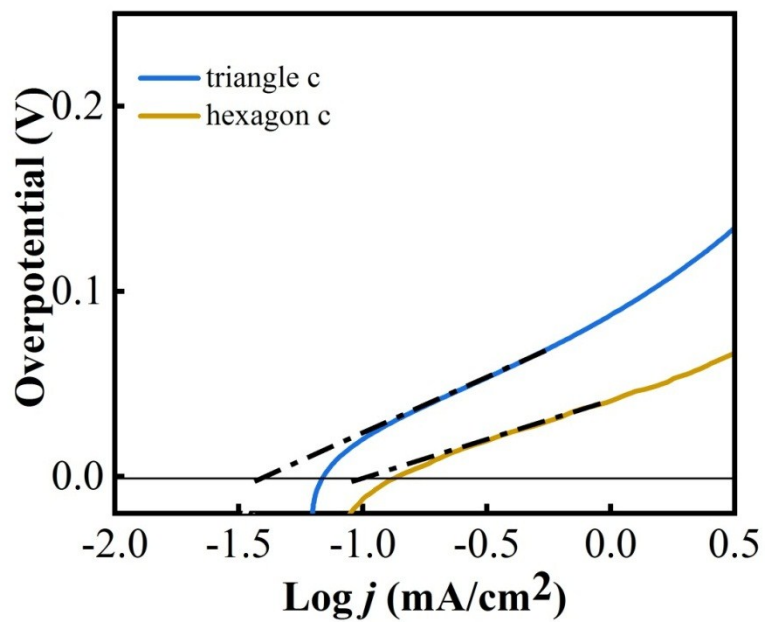

**Fig. S3** Calculated exchange current densities of triangle and hexagon samples by applying an extrapolation method to the Tafel plots.

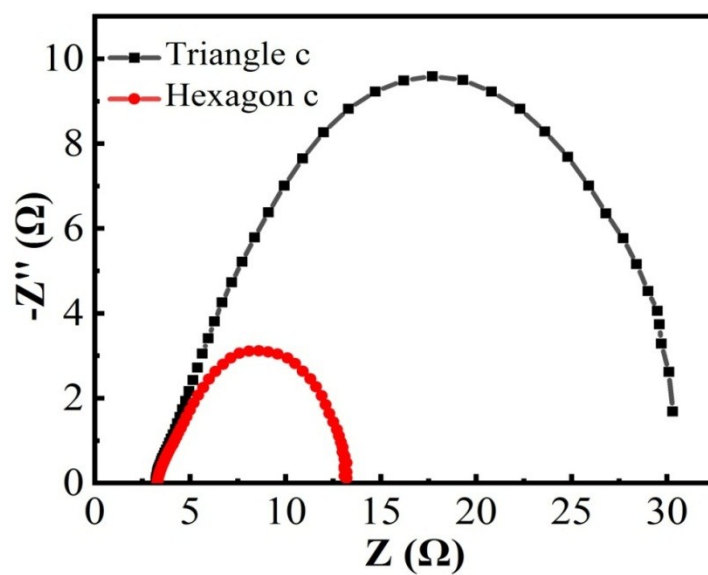

**Fig. S4** Nyquist curves of Triangle c and Hexagon c.

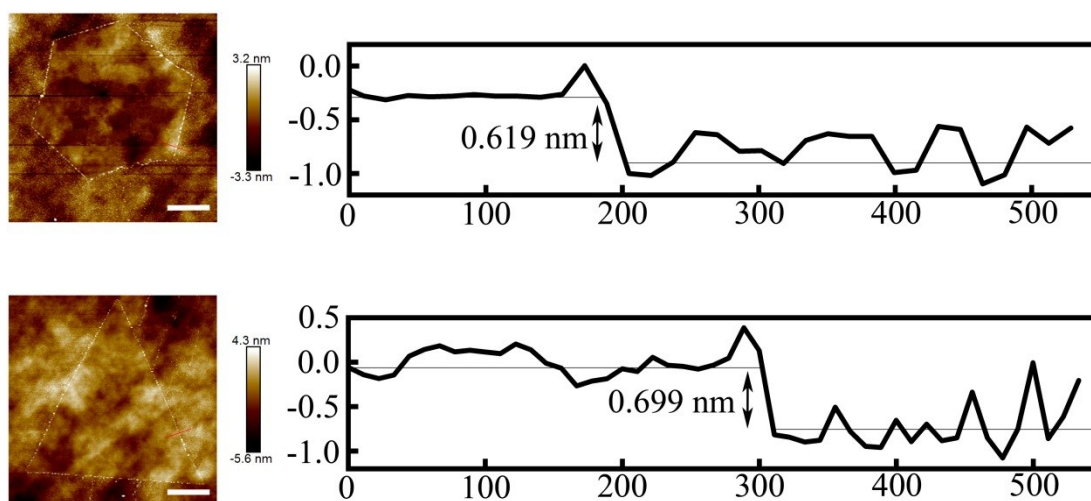

**Fig. S5** Atomic force microscopy (AFM) of monolayer (a) hexagonal and (b) triangular flakes.

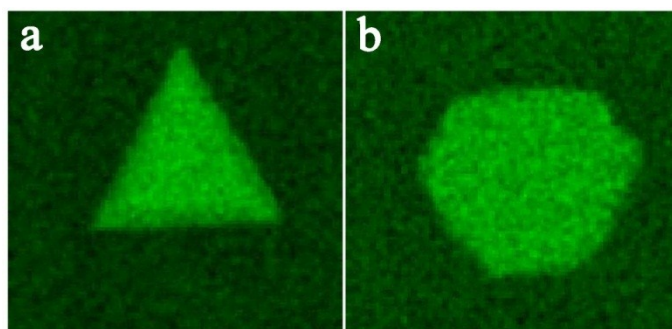

**Fig. S6**  $A_{1g}(\Gamma)$  Raman mode intensity maps excited in triangle and hexagon  $\text{MoS}_2$  domains.

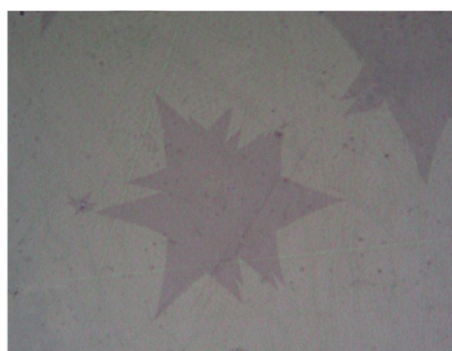

**Fig. S7** Transferred monolayer dendritic  $\text{MoS}_2$  flakes on glassy carbon.

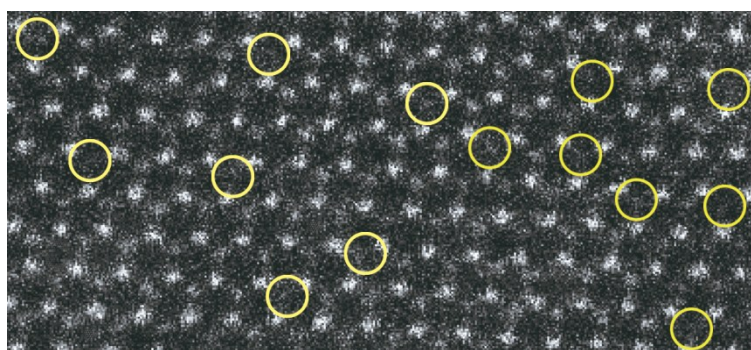

**Fig. S8** High-resolution ADF-STEM image of hexagonal flake.

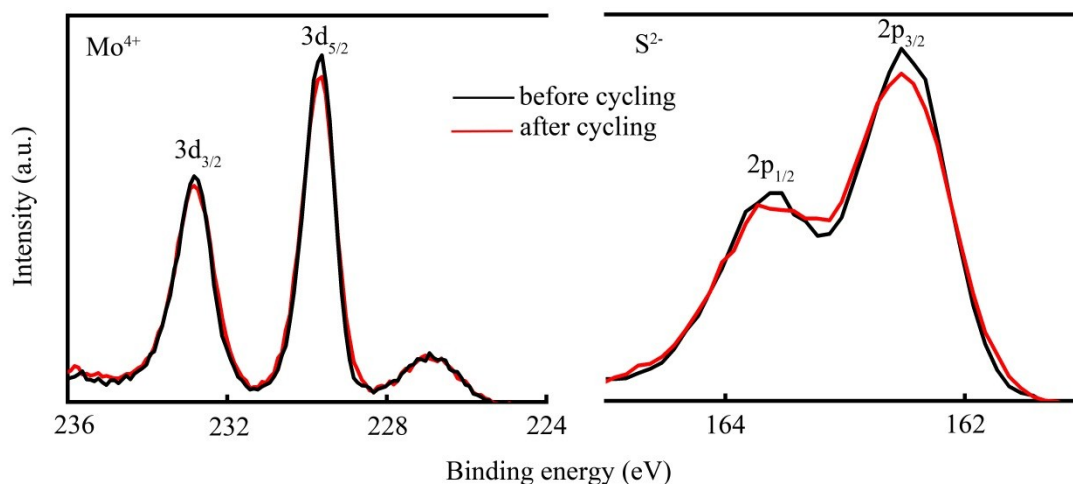

**Fig. S9** XPS of monolayer hexagonal flakes before (black curves) and after (red curves) 1000 CV scans.

### S1 Electrochemical mechanism

The electrochemical process could be explained according to three principle.[1,2]

In acidic media, three principle steps for converting  $H^+$  to  $H_2$  have been proposed.

Discharge reaction (Volmer):

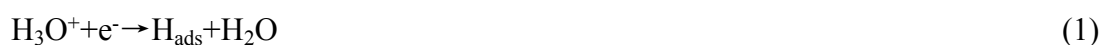

Electrochemical desorption reaction (Heyrovsky):

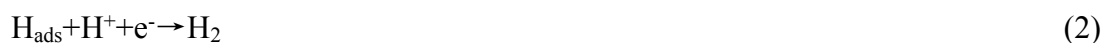

Combination reaction (Tafel):

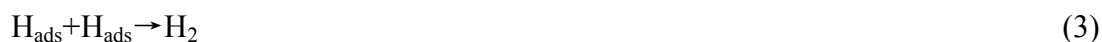

If the reaction (1) accounts for the rate-limiting step, a Tafel slope of  $\sim 120$  mV/dec should result. Tafel slope of 30 or 40 mV/dec is associated with the reaction (2) or (3), which limits the rate after reaction (1).[3,4] The Tafel slope obtained in our work is 53 mV/dec, so the HER process in our work might follow the Volmer-Tafel mechanism. Theoretical and experimental results show that S vacancies act as active sites in HER, where gap states around the Fermi level allow hydrogen to bind directly to the exposed Mo atoms (S vacancies).[5] So on the monolayer basal plane, the intermediate hydrogen adsorbs on the active sites, accepting other intermediate hydrogen to generate  $H_2$ .

A good HER catalyst should form a sufficiently strong bond with adsorbed  $H^*$  for facilitation of the proton-couple electron-transfer process, and the bond should also be weak enough to ensure a facile release of gaseous  $H_2$ . [6] Usually, the free energy change for  $H^*$  adsorption on a catalyst surface ( $\Delta G_{H^*}$ ) is used to evaluate the adsorption and desorption. According to the calculation result, for intrinsic 2H-  $MoS_2$ ,

the concentrations of S vacancy between 9-19% show the optimum free energy.[5] So, our as-grown defect-rich (with ~13.5% S vacancy concentration) monolayer hexagonal MoS<sub>2</sub> provide an ideal platform to facilitate both H\* adsorption and H<sub>2</sub> desorption.

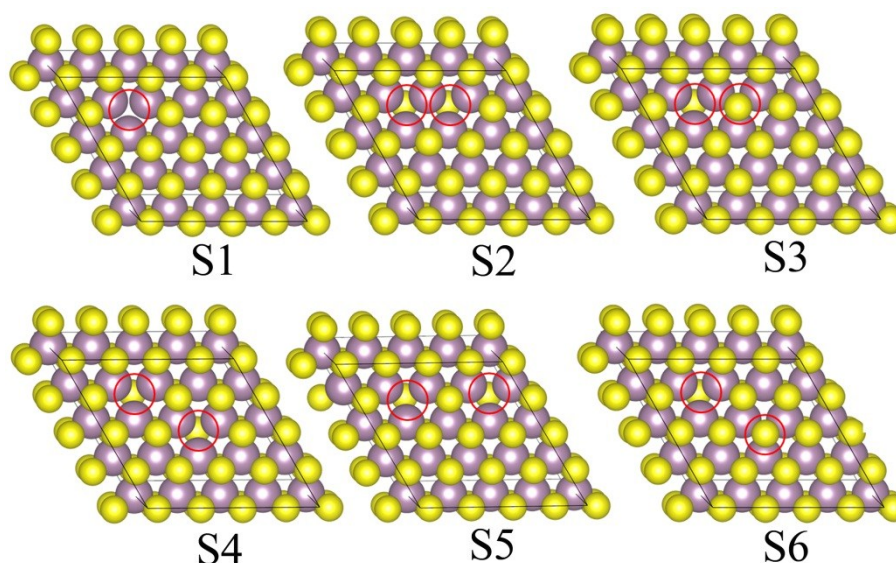

**Fig. S10** Possible configurations of two S vacancies appeared in monolayer MoS<sub>2</sub>. In S1 configuration, the two S vacancies locate on the opposite side of the basal plane. In S2 to S6 configurations, the two S vacancies locate on the same side of the basal plane

**Table S1** Total energy of possible configurations of two S vacancies corresponding to

Fig. S10.

| Model             | S1       | S2       | S3       | S4       | S5       | S6       |
|-------------------|----------|----------|----------|----------|----------|----------|
| D (Å)             | 3.12430  | 3.21134  | 4.39524  | 5.52747  | 6.38063  | 6.38850  |
| Total energy (eV) | -333.731 | -333.732 | -333.646 | -333.712 | -333.657 | -333.728 |

D: distance between two S vacancies.

Because the formation of two S vacancies is random in crystal synthesis, we tested several possible configurations of monolayer MoS<sub>2</sub> in our theoretical calculation models. While fixing the site of one S vacancy, we set up six selectable sites of another S vacancy to calculate the total energies, as shown in table S1. Although the total energies results do not change too much, the most energetically favorable site for the S vacancy is the model S2 in Fig. S10.

#### References

- [1] S. Shi, D. Gao, B. Xia, P. Liu and D. Xue, *J. Mater. Chem. A*, 2015, **3**, 24414–24421.
- [2] Y. Huang, R. J. Nielsen, W. A. Goddard and M. P. Soriaga, *J. Am. Chem. Soc.*, 2015, **137**, 6692–6698.

- [3] B. E. Conway and B. V. Tilak, *Electrochim. Acta*, 2002, **47**, 3571–3594.
- [4] N. Pentland, J. O. M. Bockris and E. Sheldon, *J. Electrochem. Soc.* 1957, **104**, 182–194.
- [5] H. Li, C. Tsai, A. L. Koh, L. Cai, A. W. Contryman, A. H. Fragapane, J. Zhao, H. S. Han, H. C. Manoharan, F. Abild-Pedersen, J. K. Nørskov and X. Zheng, *Nat. Mater.*, 2016, **15**, 49–53.
- [6] H. Liang, A. N. Gandi, D. H. Anjum, X. Wang, U. Schwingenschlögl and H. N. Alshareef, *Nano Lett.*, 2016, **16**, 7718–7725.
